# Supplementary material for: Genome-wide association mapping of quantitative trait loci for chalkiness-related traits in rice (Oryza sativa L.)
Source: Front Genet. 2024 Jul 10;15:1423648. doi: 10.3389/fgene.2024.1423648 (PMC11266141; doi:10.3389/fgene.2024.1423648)
Supplement: Supplementary file 3 [file Table2.XLS]

## Sheet: Sheet1
Table S2. The 173 rice accessions information used in this study and the mean phenotype value of chalkiness related traits in E1 and E2 environments.
Code	Germplasm name	Origin	Sourcea	Q value		DEC		PGWC
				Q1	Q2	E1	E2	E1	E2
1	Longjing 22	Heilongjiang, China	SRX6454392	0.99999	1e-05	0.985	5.89	5	12.24
2	Longjing 28	Heilongjiang, China	SRX6454389	0.987161	0.012839	0.49	30.19	3	33.33
3	Longjing 27	Heilongjiang, China	SRX6454390	0.99999	1e-05	6.32	8.61	4	14.29
4	024248	Hunan, China	SRX509806	0.870257	0.129743	10.14	35.15	47	63.04
5	Wuyunjing 21	Jiangsu,China	SRX6454492	0.963157	0.036843	100	100	100	100
6	Tijin	Jiangsu,China	SRX6454490	0.895311	0.104689	0.78	21.85	4	43.14
7	Zhongguo 91	Japan	SRX6454481	0.99064	0.00936	4.015	8.61	25	16.33
8	Kangbingyueguang	Jiangsu,China	SRX6454349	0.99999	1e-05	0.86	52.41	3	72.55
9	Hongnong 5hao	Jiangsu,China	SRX6454370	0.99999	1e-05	14.7	33.84	60	63.27
10	Guihuahuang	Jiangsu,China	SRX509710	0.99999	1e-05	100	100	100	100
11	Nannongjing 1R	Jiangsu,China	SRX6454430	0.711918	0.288082	3.49	4.13	10	8.16
12	Hongmangshajing	Jiangsu,China	SRX6454503	0.050614	0.949386	2.955	28.43	14	48.94
13	Wanhuangdao	Jiangsu,China	SRX6454488	0.99999	1e-05	0.33	4.21	3	5.17
14	Xudao 3hao	Jiangsu,China	SRX6454314	0.99999	1e-05	1.33	18.14	6	32.14
15	Youzhiyueguang	Jiangsu,China	SRX6454357	0.99999	1e-05	0.51	10.33	2	17.39
16	Yuedao 68	Vietnam	SRX6454460	1e-05	0.99999	18.315	15.4	64.57	27.66
17	Suyunuo	Jiangsu,China	SRX6454465	0.99999	1e-05	48.05	58.98	94	89.47
18	Longdao 8hao	Heilongjiang, China	SRX6454388	0.961066	0.038934	0.185	11.74	1	21.92
19	Longdao 6hao	Heilongjiang, China	SRX6454416	0.96099	0.03901	11.365	53.49	41	89.39
20	Qiutianxiaoding	Japan	SRX6454408	0.99999	1e-05	0.33	44.5	1	67.27
21	Zhenghan 2hao	Henan,China	SRX6454482	0.99999	1e-05	0.93	33.14	4	67.31
22	Xiangjing 9407	Jiangsu,China	SRX6454319	0.985873	0.014127	1.95	2.67	10.08	5.26
23	Nongxiang 21	Hunan,China	SRX6454399	1e-05	0.99999	0.335	0	1	0
24	Fengyouwan 8hao	Hunan,China	SRX6454500	1e-05	0.99999	0	1.52	0	4.35
25	Xiangwanxian 17	Hunan,China	SRX6454317	0.89489	0.10511	0	0.53	0	1.61
26	Shenlenuo	Jiangsu,China	SRX6454436	0.99999	1e-05	100	100	100	100
27	Hongjiaozhan	Jiangsu,China	SRX6454504	0.077197	0.922803	6.275	4.81	22.245	9.09
28	Yuedao 37	Vietnam	SRX6454381	1e-05	0.99999	2.71	1.73	4.5	2.87
29	Sujing 353	Jiangsu,China	SRX6454469	0.99999	1e-05	2.17	18.77	9	35.53
30	Wanjingnuo	Anhui,China	SRX6454487	0.99999	1e-05	100	100	100	100
31	Nongxiang 26	Hunan,China	SRX6454419	1e-05	0.99999	0	2.57	0	4.35
32	Yuedao 9	Vietnam	SRX6454457	1e-05	0.99999	100	100	100	100
33	Yandao 8hao	Jiangsu,China	SRX6454339	0.99999	1e-05	2.015	21.49	4	33.33
34	Huaidao 11hao	Jiangsu,China	SRX6454371	0.99999	1e-05	1.575	6.53	6.98	13.33
35	Nannongjing 004	Jiangsu,China	SRX6454429	0.99999	1e-05	3.22	18.89	17	32.61
36	Zhen9424	Jiangsu,China	SRX6454478	0.99999	1e-05	3.705	10.72	18	22.73
37	Baikenuo	Jiangsu,China	SRX6454454	0.038284	0.961716	5.07	14.45	30	26.47
38	Diantun502xuanzao	Yunnan,China	SRX6454327	1e-05	0.99999	5.36	9.74	7	20
39	Yuedao 41	Vietnam	SRX6454380	1e-05	0.99999	0.845	9.98	9	19.64
40	M1004	Jiangsu,China	SRX6454425	0.9244	0.0756	0.16	18.54	1	28.17
41	Nongxiang 25	Hunan,China	SRX6454402	1e-05	0.99999	0	1.56	0	3.7
42	Longnuo 3hao	Heilongjiang, China	SRX6454394	0.989265	0.010735	1.81	11.79	6	25
43	Mudanjiang 28	Heilongjiang, China	SRX6454432	0.946446	0.053554	1.455	18.92	6	29.73
44	Yujing 6hao	Henan,China	SRX6454464	0.99999	1e-05	0.46	2.64	3	6.52
45	Shengdao 808	Shanxi,China	SRX509795	0.99999	1e-05	1.73	19.29	5	34.62
46	Yuedao 32	Vietnam	SRX6454382	1e-05	0.99999	0.44	22.17	4.175	40
47	Yuedao 107	Vietnam	SRX6454358	0.068813	0.931187	1.095	14.3	5	27.12
48	Yuedao 61	Vietnam	SRX6454384	1e-05	0.99999	0.965	4.01	7	9.09
49	Yuedao 50	Vietnam	SRX6454376	1e-05	0.99999	0.425	5.23	2	11.84
50	Yuedao 109	Vietnam	SRX6454360	1e-05	0.99999	1.465	2.51	4	6.06
51	Longjing 20	Heilongjiang, China	SRX6454385	0.99999	1e-05	0.225	21.94	2	35.09
52	Xiangchuanwuxinbaimi	Jiangsu,China	SRX6454485	0.211254	0.788746	0.84	29.37	3	50
53	Jindao 1007	Tianjin,China	SRX6454344	0.988307	0.011693	1.285	4	5.88	7.59
54	Zaijinjing	Jiangsu,China	SRX6454462	0.99999	1e-05	2.09	6.89	14	14.58
55	Malaihong	Jiangsu,China	SRX6454426	0.306333	0.693667	2.46	7.81	8.255	17
56	Nannongjing 3786	Jiangsu,China	SRX509809	0.99999	1e-05	0.595	0	4	0
57	Wuyunjing 8hao	Jiangsu,China	SRX6454491	0.99999	1e-05	3.83	17.02	11	26.92
58	Yuzhenxiang	Hunan,China	SRX6454461	0.428729	0.571271	0.71	0	8	0
59	Yuedao 24	Vietnam	SRX6454353	1e-05	0.99999	0	12.54	0	23.33
60	Yuedao 3	Vietnam	SRX6454354	1e-05	0.99999	1.06	14.66	4	28.57
61	Yuedao 43	Vietnam	SRX6454379	0.047707	0.952293	2.135	8.12	9	15.63
62	Yuedao 48	Vietnam	SRX6454378	1e-05	0.99999	0	5.78	0	11.76
63	Yuedao 49	Vietnam	SRX6454377	1e-05	0.99999	1.05	3.97	3.02	9.76
64	Yuedao 13	Vietnam	SRX6454362	1e-05	0.99999	13.78	1.28	43	2.44
65	Zhognzuo 93	Japan	SRX509833	0.99999	1e-05	1.875	12.46	7.02	22.67
66	Xudao 5hao	Jiangsu,China	SRX6454312	0.99999	1e-05	0.975	7.68	5	12.31
67	Di glu dao	Jiangsu,China	SRX6454328	0.99999	1e-05	4.49	19.1	21	33.33
68	Huaidao 8hao	Jiangsu,China	SRX6454368	0.99999	1e-05	1.25	8.02	4.04	14.63
69	Dongzheng 1640	Jiangsu,China	SRX6454330	0.99999	1e-05	0.47	2.41	2.98	4
70	Yanjing 8hao	Jiangsu,China	SRX6454335	0.99999	1e-05	1.53	16.69	7	29.69
71	Huifeng 2	Jiangsu,China	SRX6454372	0.99999	1e-05	2.445	11.69	10	18.37
72	Yandao 9hao	Jiangsu,China	SRX6454334	0.99999	1e-05	3.465	11.01	9	23.26
73	Lianjing 4hao	Jiangsu,China	SRX6454424	0.988719	0.011281	0.39	4.1	1	6.15
74	Huifeng 1	Jiangsu,China	SRX6454365	0.99999	1e-05	1.085	6.6	7	10.34
75	Sihao 4280	Jiangsu,China	SRX6454472	0.99999	1e-05	3.67	4.03	12	7.14
76	Sihao 4330	Jiangsu,China	SRX6454473	0.99999	1e-05	1.67	7.87	9	13.79
77	Sihao 4259	Jiangsu,China	SRX6454471	0.980065	0.019935	3.685	39.01	12	62.92
78	Zhengdao 18	Henan,China	SRX6454479	0.99999	1e-05	3.015	7.84	10	14.12
79	Jingnuo 330	Anhui,China	SRX6454350	0.99999	1e-05	3.735	5.17	10.12	10
80	Zhongjing 212	Jiangsu,China	SRX6454476	0.977194	0.022806	1.66	6.57	10	11.49
81	Wuyunjing 21hao	Jiangsu,China	SRX6454492	0.99999	1e-05	0.36	5.29	1	10
82	Huajing 6hao	Jiangsu,China	SRX6454367	0.99999	1e-05	0	0.5	0	1.18
83	Yangfujing 8hao	Jiangsu,China	SRX6454337	0.99999	1e-05	0.655	0.61	3	1.19
84	Zhendao 99	Jiangsu,China	SRX6454477	0.99999	1e-05	0.955	4.96	4	9.88
85	Ningjing 2hao	Jiangsu,China	SRX6454396	0.99999	1e-05	1.775	19.04	7	34.67
86	Huajing 5hao	Jiangsu,China	SRX6454366	0.884833	0.115167	4.19	17.05	15	31.58
87	Zhongjing 9677	Jiangsu,China	SRX6454506	0.99999	1e-05	0.87	11.17	5	19.48
88	Yangfujing 7hao	Jiangsu,China	SRX6454338	0.99999	1e-05	0.12	1.86	1	2.6
89	Yuedao 12	Vietnam	SRX6454361	1e-05	0.99999	0.745	4.49	3	10.26
90	Yuedao 62	Vietnam	SRX6454383	1e-05	0.99999	0.695	4.64	4.02	8.45
91	Wunuoyihao	Jiangsu,China	SRX6454493	0.99999	1e-05	100	100	100	100
92	Yuedao 66	Vietnam	SRX6454459	1e-05	0.99999	8.005	10.69	22	20
93	Wumangyedao	Shanghai,China	SRX6454494	0.99999	1e-05	0.625	18.15	4	32.08
94	Haobuka	Jiangsu,China	SRX6454496	1e-05	0.99999	13.19	37.01	47	68.97
95	Yuedao 22	Vietnam	SRX6454363	1e-05	0.99999	2.895	8.28	11.225	18.67
96	Jianongnuo 2hao	Jiangsu,China	SRX6454341	0.99999	1e-05	100	100	100	100
97	Xudao 4hao	Jiangsu,China	SRX6454311	0.99999	1e-05	1.245	8.12	4	13.46
98	Sihao 4040	Jiangsu,China	SRX6454439	0.99999	1e-05	0.29	0	1	0
99	Yanjing 9hao	Jiangsu,China	SRX6454332	0.99999	1e-05	2.455	27.22	9	44.62
100	Sihao 4081ck	Jiangsu,China	SRX6454441	0.95145	0.04855	0.21	3.3	1.96	4.94
101	Sihao 4041	Jiangsu,China	SRX6454442	0.983193	0.016807	1.55	7.78	9	13.25
102	Sihao 4031	Jiangsu,China	SRX6454440	0.76435	0.23565	1.16	0.59	6	1.32
103	Wandao 68	Anhui,China	SRX6454489	0.989978	0.010022	35.565	30.21	82.735	59.18
104	Wuxiang 99-8	Jiangsu,China	ERS039280	0.99999	1e-05	1.08	6.67	4	14.29
105	Zhongjing 131	Jiangsu,China	SRX6454483	0.99999	1e-05	4.035	15.97	10	27.78
106	Ningjinghui 260	Jiangsu,China	SRX6454398	0.99999	1e-05	2.57	8.4	9	16.67
107	Ningjinghui 237	Jiangsu,China	SRX6454395	0.894106	0.105894	3.8	13.8	20	25
108	Sihao 4029	Jiangsu,China	SRX6454437	0.99999	1e-05	0.725	2.4	4	5.17
109	Ludao	Jiangsu,China	SRX6454427	0.99999	1e-05	2.86	9.95	12	20
110	Yangfujing 4901	Jiangsu,China	SRX6454333	0.99999	1e-05	6.955	13.19	23	24
111	Yandao 6hao	Jiangsu,China	SRX6454340	0.951457	0.048543	1.655	3.97	8	8.47
112	Cbao	Anhui,China	SRX6454323	0.89353	0.10647	10.72	12.16	36	21.21
113	Zhendao 10hao	Jiangsu,China	SRX6454480	1e-05	0.99999	22.47	5.05	84	9.43
114	Baoxintaihuqing	Jiangsu,China	SRX6454453	0.363107	0.636893	4.93	40.69	29	78
115	Huaidao 9hao	Jiangsu,China	SRX6454369	0.951659	0.048341	0	3.33	0	6.67
116	Xiaobaidao	Jiangsu,China	SRX6454318	0.99999	1e-05	6.63	24.7	35	46.75
117	Yaxuenuo	Jiangsu,China	SRX6454331	0.99999	1e-05	1.465	6.782	6	17
118	Yangguang 200	Jiangsu,China	SRX6454336	0.99999	1e-05	4.12	10.28	14	18.18
119	Zaoshirihuangdao	Jiangsu,China	SRX6454456	0.99999	1e-05	0.465	2.678	3	15
120	Luohanhuang	Jiangsu,China	SRX6454428	0.99999	1e-05	0.365	5.319	1	6
121	Xudao 2hao	Jiangsu,China	SRX509826	0.850944	0.149056	12.9	9.58	49.47	19.05
122	Xudao 9201B	Jiangsu,China	SRX509712	0.99999	1e-05	3.675	4.94	16	9.09
123	Ebusinuodao	Zhejiang, China	SRX509813	0.99999	1e-05	1.22	2.21	3	5.36
124	Yueguang	Japan	SRX6454458	0.99999	1e-05	3.66	18.68	16	31.15
125	Yimuhu	Jiangsu,China	SRX6454356	1e-05	0.99999	0.16	7.84	1	14.29
126	Qingkong	Jiangsu,China	SRX6454407	0.99999	1e-05	0	20.2	0	34.48
127	RT61	Japan	SRX6454412	0.99999	1e-05	0.1	22.5	1	39.39
128	IL38	Japan	SRX6454346	0.99999	1e-05	10.895	5.26	69.655	9.62
129	Liuyezhan	Hubei,China	SRX509786	1e-05	0.99999	18.945	38.15	36	77.78
130	Zaoxian 14	Anhui, China	SRX510025	0.018444	0.981556	1.035	0.58	3.085	1.2
131	Xu91075	Jiangsu,China	SRX6454316	1e-05	0.99999	24.215	23	85.795	85
132	Xudao 25-7	Jiangsu,China	SRX6454313	0.99999	1e-05	8.4	15.12	25	25.53
133	Qing7	Jiangsu,China	SRX6454403	1e-05	0.99999	0	1.38	0	3.08
134	Sihao 4141	Jiangsu,China	SRX6454443	0.99999	1e-05	5.765	5.99	14.12	9.09
135	SH189	Jiangsu,China	SRX6454409	0.534521	0.465479	0.23	3.03	2	6.15
136	SHN1	Jiangsu,China	SRX6454438	1e-05	0.99999	7.865	32.2	34.345	62.5
137	Suwujing	Jiangsu,China	SRX6454470	1e-05	0.99999	100	100	100	100
138	9522B	Jiangsu,China	SRX6454449	0.99999	1e-05	10.045	14.14	25	31.82
139	863B	Jiangsu,China	SRX6454450	0.978201	0.021799	1.655	2.34	6	4.82
140	Biaojiyongzijing	Jiangsu,China	SRX6454446	0.922771	0.077229	100	100	100	100
141	Zigu	Jiangsu,China	SRX6454508	0.059563	0.940437	5.395	45.34	25	86.08
142	Jiangpuchangliheimidao	Jiangsu,China	SRX6454342	0.14841	0.85159	45.678	82.96	59	100
143	A7444	Jiangsu,China	SRX6454452	0.89154	0.10846	100	100	100	100
144	Xiepihuang	Jiangsu,China	SRX6454315	0.99999	1e-05	1.655	20.56	9	31.58
145	Shengtangqing	Jiangsu,China	SRX6454413	0.168638	0.831362	0.92	2.87	5	12
146	Chuan 6xian	Sichuan,China	SRX6454326	1e-05	0.99999	100	100	100	100
147	Chuan 5xian	Sichuan,China	SRX6454325	1e-05	0.99999	1.356	2.68	2	5.13
148	Shufeng 101	Sichuan,China	SRX509694	1e-05	0.99999	22.72	62.78	95	97.92
149	Chengnongshuijing	Sichuan,China	SRX509708	1e-05	0.99999	5.705	18.12	40.445	24.14
150	Xiangxiandao 10hao	Hunan,China	SRX6454486	0.057773	0.942227	4.26	3.12	11.08	6.41
151	Ⅱ-32B	Hunan,China	SRX6454373	0.029498	0.970502	2.725	20.55	10	36.76
152	Chenwan 3hao	Hunan, China	SRX509833	1e-05	0.99999	10.525	44.57	35	70.69
153	Xiangaizao 10hao	Hunan, China	SRX509679	1e-05	0.99999	12.335	51.84	56.57	81.48
154	Yuetai B	Guangdong,China	SRX6454463	0.008927	0.991073	1.22	16.64	9	33.33
155	Qimiaoxiang 2hao	Guangdong,China	SRX6454404	1e-05	0.99999	8.86	6.34	29	11.36
156	Shengyou 2hao	Guangdong,China	SRX6454414	0.042138	0.957862	0.145	2.56	1.02	5.26
157	Guichao 2hao	Guangdong,China	SRX509700	1e-05	0.99999	23.075	38.85	95	69.64
158	Minghui 63	Fujian,China	SRX6454431	1e-05	0.99999	2.265	4.53	11.1	8.7
159	Longtepu B	Fujian,China	SRX6454393	1e-05	0.99999	9.775	53.81	44.215	90.32
160	Hainanxian R	Hainan,China	SRX6454497	0.020042	0.979958	5.7	3.45	19	6.35
161	Zajiaohaigu	Hainan,China	SRX6454455	0.011464	0.988536	31.72	47.95	96	94.23
162	Nuohangu	Yunnan,China	SRX6454401	0.912339	0.087661	100	100	100	100
163	Lincangwazudiquhangu	Yunnan,China	SRX6454417	0.911317	0.088683	100	100	100	100
164	Yuedao 55	Vietnam	SRX6454375	1e-05	0.99999	1.64	23.87	8	37.18
165	Yuedao 108	Vietnam	SRX6454359	0.06996	0.93004	16.15	23.72	85.9	47.27
166	IR112	Philippines	SRX6454345	1e-05	0.99999	2.08	4.657	8.245	14
167	IR64	Philippines	SRX6454347	1e-05	0.99999	3.04	4.4	11	10
168	Arias	Indonesia	SRX6454451	0.035517	0.964483	4.505	5.32	16	10
169	CAMOR	Indonesia	SRX6454322	0.825085	0.174915	50.59	63.52	100	87.67
170	Gendjah Gempol	Indonesia	SRX6454499	0.792601	0.207399	10.705	21.88	50.51	39.71
171	BULUH BAWU	Indonesia	SRX6454321	0.848138	0.151862	22.03	1.04	56.25	2
172	Cailiao 1	Indonesia	SRX6454406	0.99999	1e-05	1.63	7.39	5	12.82
173	Cailiao 2	Indonesia	SRX6454411	0.99999	1e-05	25.45	21.74	92.92	54.79
a ERS and SRX indicated the NCBI sequence Read Archive (SRA) accession number.
